# Supplementary material for: LncRNA-H19 regulates chemoresistance to carboplatin in epithelial ovarian cancer through microRNA-29b-3p and STAT3
Source: PubMed Central journal article supplement (PMC8408112; doi:10.7150/jca.58979), 2021-07-25
Supplement: jcav12p5712s1.pdf [file jcav12p5712s1.pdf]

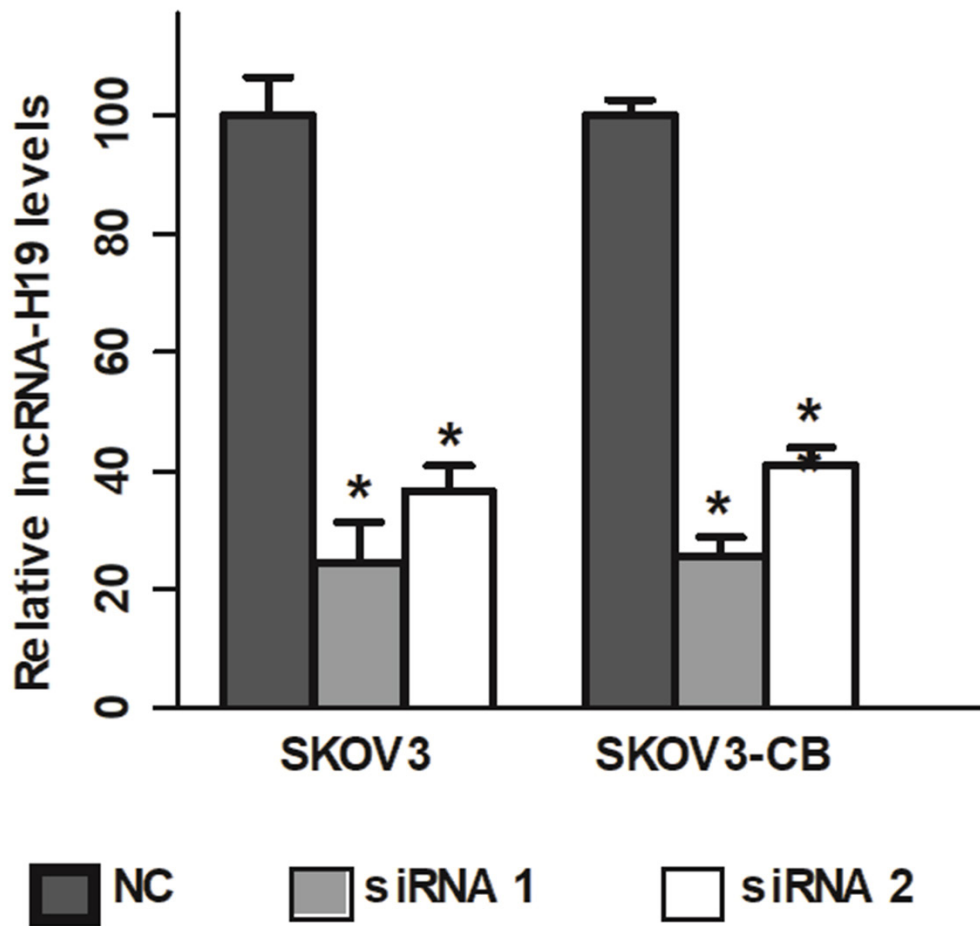

Figure S1: knockdown efficiency of IncRNA-H19 by si-H19.
